# Supplementary material
Source: PubMed Central journal article supplement (PMC3341091)
Supplement: NIHMS370981-supplement-01.pdf [file NIHMS370981-supplement-01.pdf]

SUPPLEMENTAL MATERIAL

Supplementary Figure: Linkage disequilibrium between the 50 SNPs further evaluated in the validation cohort

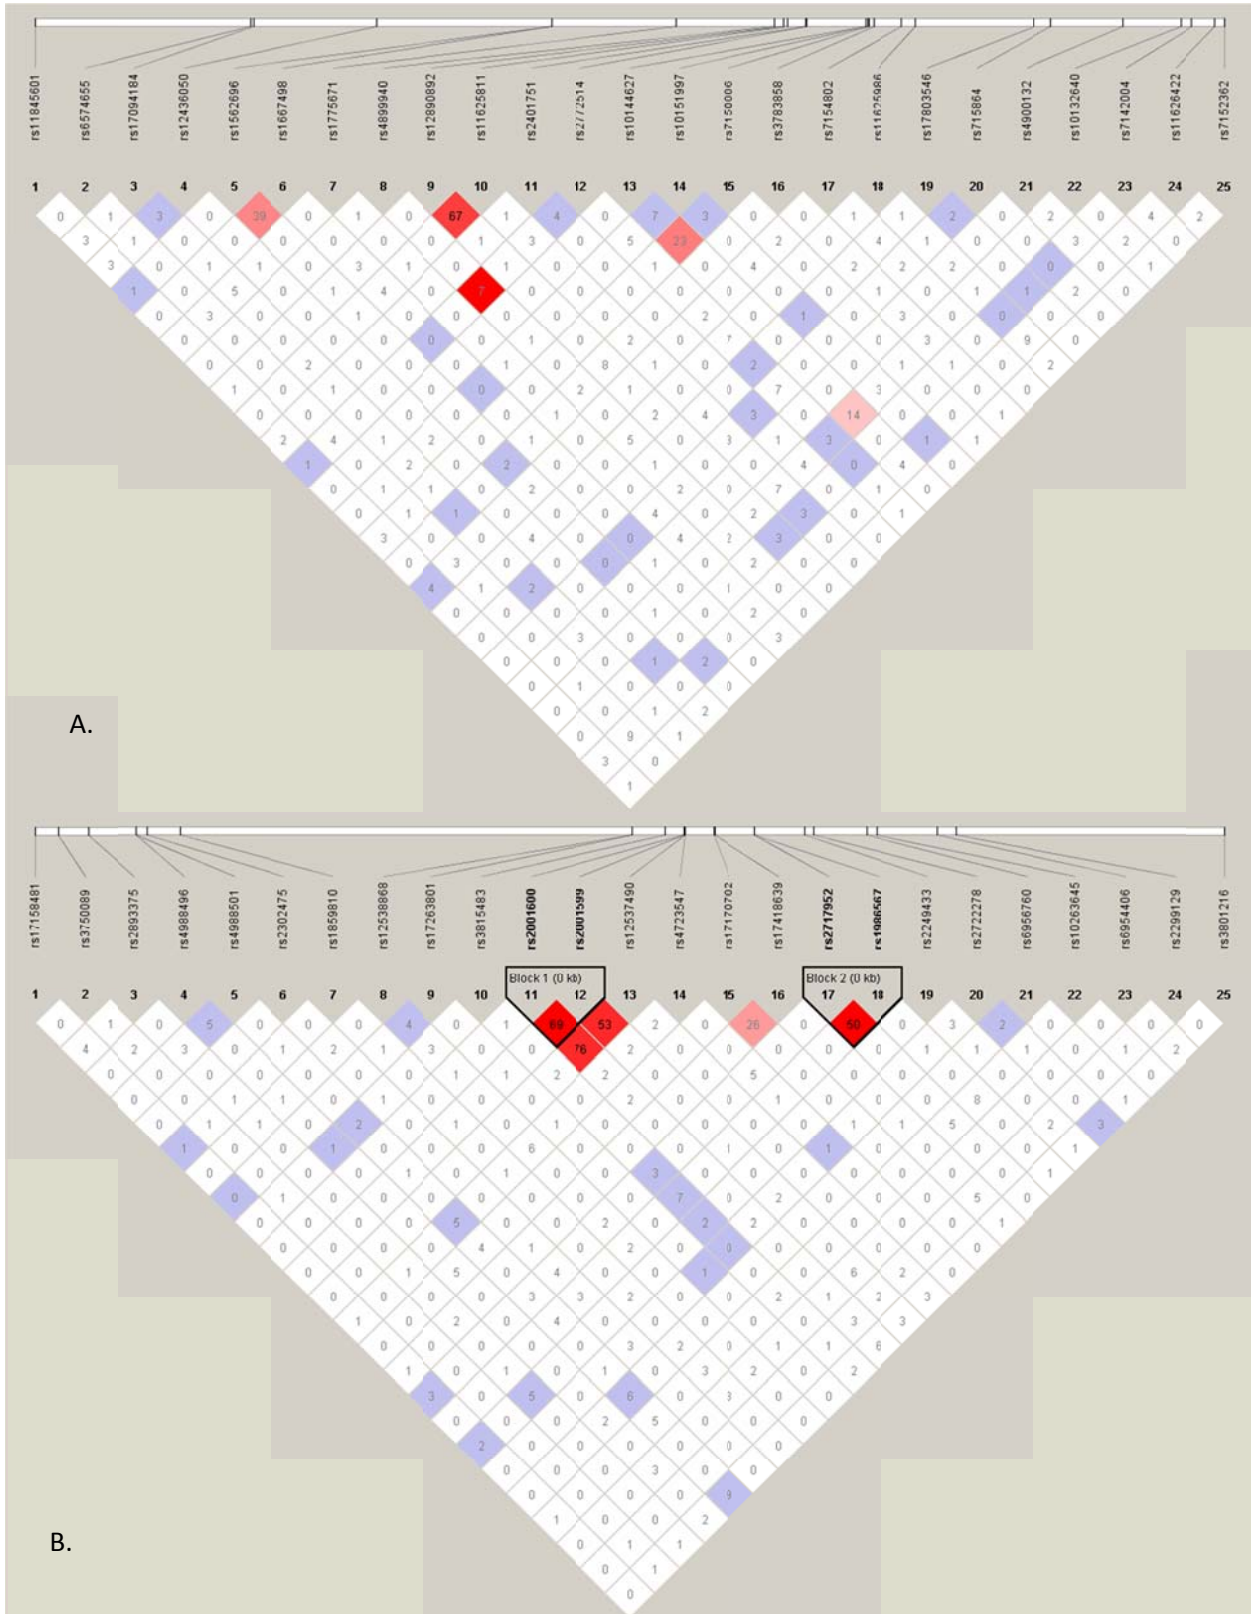

**Supplementary figure legend:**

We prioritized 50 SNPs (25 SNPs under each QTL) for validation in the NOMAS DR subcohort. Pairwise  $r^2$  between these SNPs was estimated in the probands of the 100 DR families and is displayed by gray-shaded square with the hundredths of  $r^2$  value inside. The shades of gray are proportional to the  $r^2$  values, with the darkest gray being the highest  $r^2$  value. A). Chromosome 7 SNPs; B) Chromosome 14 SNPs.

**Supplementary Table 1.**

| SNP                 | Without SNP Covariates |                | With SNP Covariates |                | Chi-Square | Degree of Freedom | P value |
|---------------------|------------------------|----------------|---------------------|----------------|------------|-------------------|---------|
|                     | MLOD*                  | Log-Likelihood | MLOD                | Log-Likelihood |            |                   |         |
| <i>chromosom 7</i>  |                        |                |                     |                |            |                   |         |
| rs3815483           | 3.34                   | -418.10        | 2.35                | -413.71        | 8.78       | 1                 | 0.0061  |
| rs2001600           | 3.34                   | -418.10        | 2.92                | -414.03        | 8.15       | 1                 | 0.0086  |
| All SNPs            | 3.34                   | -418.10        | 1.89                | -410.59        | 15.02      | 2                 | 0.0002  |
| <i>chromosom 14</i> |                        |                |                     |                |            |                   |         |
| rs7152362           | 2.18                   | -203.45        | 1.95                | -202.59        | 1.71       | 1                 | 0.3820  |
| rs17803546          | 2.18                   | -203.45        | 1.90                | -200.60        | 5.71       | 1                 | 0.0337  |
| rs10151430          | 2.17                   | -203.58        | 2.01                | -202.32        | 2.52       | 1                 | 0.2248  |
| rs1667498           | 2.01                   | -202.26        | 1.93                | -201.11        | 2.29       | 1                 | 0.2604  |
| rs10144627          | 2.18                   | -203.45        | 1.96                | -201.37        | 4.15       | 1                 | 0.0833  |
| rs10151997          | 2.18                   | -203.45        | 1.96                | -201.67        | 3.55       | 1                 | 0.1191  |
| All SNPs            | 2.00                   | -202.40        | 1.09                | -193.81        | 17.17      | 6                 | 0.0174  |

\*MLOD=maximum of multipoint LOD score. To ensure a meaningful comparison of LOD score change before and after including the associated SNPs as covariates, we kept the same families used in the before and after analysis. As a result, the MLOD varied slightly in the analysis without inclusion of the associated SNP genotype as a covariate due to exclusion of different families that had missing genotypes for the associated SNPs.

Supplementary Table 2.

| Chr | SNP        | BP       | Allele* | Gene         | Function | Family Date Set |           |          |         |         |         | NOMAS DR |         |             |
|-----|------------|----------|---------|--------------|----------|-----------------|-----------|----------|---------|---------|---------|----------|---------|-------------|
|     |            |          |         |              |          | MAF**           | $\beta$ † | P values |         |         |         | MAF**    | $\beta$ | P value     |
|     |            |          |         |              |          |                 |           | QTDT     | MG      | QLTD    | FBAT    |          |         |             |
| 7   | rs17158481 | 29927822 | C       | SCRN1        | utr-3    | 0.064           | -0.0324   | 0.008    | 0.497   | 0.055   | 0.062   | 0.083    | -0.0020 | 0.844       |
| 7   | rs3750089  | 30167123 | C       | C7orf41      | utr-3    | 0.383           | -0.0094   | 0.127    | 0.229   | 0.012   | 0.368   | 0.322    | -0.0079 | 0.174       |
| 7   | rs2893375  | 30477377 | C       | NOD1         | intron   | 0.149           | -0.0182   | 0.042    | 0.168   | 0.018   | 0.008   | 0.165    | -0.0008 | 0.914       |
| 7   | rs4988496  | 30975210 | A       | GHRHR        | missense | 0.149           | 0.0186    | 0.033    | 0.013   | 0.096   | 0.322   | 0.155    | 0.0060  | 0.425       |
| 7   | rs4988501  | 30978009 | G       | GHRHR        | intron   | 0.250           | -0.0186   | 0.014    | 0.008   | 0.015   | 0.107   | 0.242    | -0.0052 | 0.427       |
| 7   | rs2302475  | 31088025 | C       | ADCYAP1R1    | intron   | 0.484           | 0.0164    | 0.01     | 0.088   | 0.017   | 0.041   | 0.471    | -0.0035 | 0.525       |
| 7   | rs1859810  | 31428355 | C       |              |          | 0.199           | -0.0180   | 0.036    | 0.001   | 0.00035 | 0.294   | 0.192    | -0.0091 | 0.191       |
| 7   | rs12538868 | 36091051 | T       | PP13004      | utr-3    | 0.332           | -0.0125   | 0.051    | 0.152   | 0.109   | 0.042   | 0.389    | 0.0031  | 0.584       |
| 7   | rs17263801 | 36091368 | A       | PP13004      | utr-3    | 0.087           | -0.0340   | 0.006    | 0.282   | 0.044   | 0.081   | 0.080    | 0.0019  | 0.861       |
| 7   | rs3815483  | 36427864 | G       | ANLN         | intron   | 0.069           | 0.0477    | 0.00023  | 0.00026 | 0.002   | 0.039   | 0.067    | 0.0000  | 0.998       |
| 7   | rs2001600  | 36620605 | C       | AOAH         | intron   | 0.410           | -0.0198   | 0.001    | 0.001   | 0.003   | 0.00008 | 0.410    | 0.0059  | 0.309       |
| 7   | rs2001599  | 36620762 | C       | AOAH         | intron   | 0.500           | -0.0175   | 0.004    | 0.003   | 0.019   | 0.00048 | 0.470    | 0.0062  | 0.274       |
| 7   | rs12537490 | 36626416 | T       | AOAH         | intron   | 0.398           | -0.0190   | 0.002    | 0.005   | 0.016   | 0.00015 | 0.385    | 0.0020  | 0.73        |
| 7   | rs4723547  | 36633473 | A       | AOAH         | intron   | 0.133           | -0.0216   | 0.006    | 0.062   | 0.001   | 0.065   | 0.135    | -0.0018 | 0.828       |
| 7   | rs17170782 | 36923066 | A       | ELMO1        | intron   | 0.282           | -0.0217   | 0.004    | 0.506   | 0.011   | 0.038   | 0.251    | 0.0053  | 0.415       |
| 7   | rs17418639 | 36937132 | G       | ELMO1        | intron   | 0.197           | -0.0204   | 0.008    | 0.419   | 0.01    | 0.096   | 0.196    | 0.0039  | 0.587       |
| 7   | rs2717952  | 37352622 | C       | ELMO1        | intron   | 0.319           | -0.0176   | 0.007    | 0.004   | 0.00046 | 0.023   | 0.317    | -0.0051 | 0.433       |
| 7   | rs1986567  | 37353174 | G       | ELMO1        | intron   | 0.484           | -0.0155   | 0.011    | 0.007   | 0.007   | 0.01    | 0.449    | -0.0098 | 0.089       |
| 7   | rs2249433  | 37867712 | T       | TXNDC3       | intron   | 0.245           | -0.0235   | 0.002    | 0.032   | 0.00015 | 0.269   | 0.177    | 0.0064  | 0.362       |
| 7   | rs2722278  | 37957441 | A       | EPDR1        | utr-3    | 0.106           | -0.0094   | 0.361    | 0.041   | 0.036   | 0.33    | 0.125    | 0.0047  | 0.579       |
| 7   | rs6956760  | 38504422 | G       | AMPH         | intron   | 0.154           | 0.0255    | 0.002    | 0.874   | 0.39    | 0.003   | 0.182    | -0.0072 | 0.316       |
| 7   | rs10263645 | 38603415 | C       | AMPH         | intron   | 0.282           | -0.0142   | 0.035    | 0.727   | 0.01    | 0.003   | 0.293    | 0.0063  | 0.299       |
| 7   | rs6954406  | 39243640 | G       | POU6F2       | intron   | 0.495           | -0.0131   | 0.034    | 0.005   | 0.006   | 0.032   | 0.492    | 0.0062  | 0.261       |
| 7   | rs2299129  | 39433829 | C       | LOC100134410 | intron   | 0.303           | -0.0138   | 0.065    | 0.033   | 0.007   | 0.05    | 0.316    | 0.0078  | 0.187       |
| 7   | rs3801216  | 42199807 | A       | GLI3         | intron   | 0.226           | 0.0237    | 0.001    | 0.033   | 0.046   | 0.001   | 0.292    | -0.0146 | <b>0.02</b> |
| 14  | rs11845601 | 78260765 | C       | NRXN3        | intron   | 0.133           | -0.0175   | 0.009    | 0.02    | 0.028   | 0.11    | 0.149    | -0.0007 | 0.922       |
| 14  | rs6574655  | 80978357 | A       | LOC3882      | intron   | 0.255           | -0.0168   | 0.004    | 0.023   | 0.007   | 0.055   | 0.281    | 0.0093  | 0.067       |
| 14  | rs17094184 | 81012569 | C       | SEL1L        | utr-3    | 0.074           | 0.0173    | 0.096    | 0.025   | 0.13    | 0.079   | 0.061    | 0.0098  | 0.314       |

|    |            |          |   |           |             |       |         |         |       |       |       |       |         |              |
|----|------------|----------|---|-----------|-------------|-------|---------|---------|-------|-------|-------|-------|---------|--------------|
| 14 | rs12436050 | 82572244 | G |           |             | 0.293 | 0.0130  | 0.025   | 0.024 | 0.012 | 0.005 | 0.282 | -0.0087 | 0.081        |
| 14 | rs1562696  | 84784436 | T |           |             | 0.101 | -0.0243 | 0.005   | 0.27  | 0.028 | 0.012 | 0.123 | -0.0094 | 0.179        |
| 14 | rs1667498  | 84784618 | A |           |             | 0.081 | -0.0313 | 0.00062 | 0.103 | 0.006 | 0.1   | 0.088 | -0.0083 | 0.33         |
| 14 | rs1775671  | 86373672 | C |           |             | 0.261 | -0.0187 | 0.002   | 0.387 | 0.005 | 0.007 | 0.265 | 0.0033  | 0.542        |
| 14 | rs4899940  | 87623620 | A |           |             | 0.473 | 0.0140  | 0.006   | 0.007 | 0.003 | 0.021 | 0.485 | 0.0089  | 0.062        |
| 14 | rs12890892 | 87741400 | A | KCNK1     | intron      | 0.431 | 0.0167  | 0.002   | 0.012 | 0.003 | 0.074 | 0.446 | 0.0067  | 0.171        |
| 14 | rs11625811 | 87792126 | A | KCNK1     | intron      | 0.452 | 0.0115  | 0.034   | 0.004 | 0.008 | 0.644 | 0.468 | 0.0033  | 0.5          |
| 14 | rs2401751  | 88016374 | A | PTPN21    | missense    | 0.319 | 0.0115  | 0.032   | 0.204 | 0.098 | 0.192 | 0.305 | 0.0098  | 0.07         |
| 14 | rs2772514  | 88023156 | C | PTPN21    | intron      | 0.080 | -0.0145 | 0.135   | 0.019 | 0.008 | 0.015 | 0.073 | -0.0076 | 0.401        |
| 14 | rs10144627 | 88766285 | T | FOXN3     | intron      | 0.442 | 0.0198  | 0.00023 | 0.023 | 0.002 | 0.047 | 0.456 | 0.0023  | 0.624        |
| 14 | rs10151997 | 88786186 | T | FOXN3     | intron      | 0.053 | 0.0394  | 0.001   | 0.032 | 0.047 | 0.452 | 0.069 | -0.0020 | 0.835        |
| 14 | rs7150886  | 88801851 | C | FOXN3     | intron      | 0.362 | -0.0180 | 0.001   | 0.215 | 0.006 | 0.45  | 0.334 | -0.0082 | 0.09         |
| 14 | rs3783858  | 88863309 | C | FOXN3     | intron      | 0.176 | -0.0186 | 0.012   | 0.15  | 0.039 | 0.014 | 0.127 | 0.0108  | 0.13         |
| 14 | rs7154802  | 89222935 | C |           |             | 0.239 | -0.0140 | 0.018   | 0.168 | 0.022 | 0.008 | 0.288 | 0.0001  | 0.98         |
| 14 | rs11625986 | 89398930 | G | C14orf143 | intron      | 0.117 | -0.0204 | 0.006   | 0.133 | 0.009 | 0.155 | 0.135 | 0.0057  | 0.4          |
| 14 | rs17803546 | 90906477 | A | CCDC88C   | intron      | 0.218 | 0.0222  | 0.001   | 0.008 | 0.001 | 0.089 | 0.217 | 0.0037  | 0.517        |
| 14 | rs715864   | 91116389 | T | CATSPERB  | near-gene-5 | 0.069 | -0.0091 | 0.344   | 0.007 | 0.022 | 0.037 | 0.078 | 0.0025  | 0.784        |
| 14 | rs4900132  | 92029990 | G | SLC24A4   | utr-3       | 0.192 | -0.0077 | 0.234   | 0.314 | 0.033 | 0.89  | 0.201 | -0.0002 | 0.967        |
| 14 | rs10132640 | 92754566 | C | C14orf13  | intron      | 0.266 | -0.0178 | 0.005   | 0.581 | 0.028 | 0.001 | 0.197 | -0.0060 | 0.329        |
| 14 | rs7142004  | 92905338 | A | KIAA149   | intron      | 0.043 | -0.0346 | 0.005   | 0.131 | 0.017 | 0.02  | 0.066 | 0.0099  | 0.315        |
| 14 | rs11626422 | 93191522 | A | KIAA149   | intron      | 0.170 | -0.0199 | 0.003   | 0.042 | 0.003 | 0.02  | 0.163 | 0.0021  | 0.738        |
| 14 | rs7152362  | 93310468 | A | PRIMA1    | intron      | 0.441 | -0.0197 | 0.00007 | 0.095 | 0.002 | 0.003 | 0.413 | -0.0098 | <b>0.047</b> |

\*Allele is the minor allele and also the tested allele for both family-based and NOMAS DR association

\*\*MAF: minor allele frequency for the family study was computed in probands only and in everyone for the NOMAS DR cohort

† regression coefficients for the within family components of the genotype scores, taken from SOLAR QTDT

We prioritized 50 SNPs (25 SNPs under each QTL) for validation in the NOMAS DR subcohort. P values from the QTDT QLTD, MG and FBAT tests in 100 DR families and the linear regression test in 553 NOMAS DR subjects are shown in the table. P values less than 0.05 in the linear regression test are in bold.
